# Supplementary material
Source: Springer Nature journal article supplement (https://www.springermedizin.de/resource/supplementary/13054_2010_8778_MOESM4_ESM.pdf/9732544)

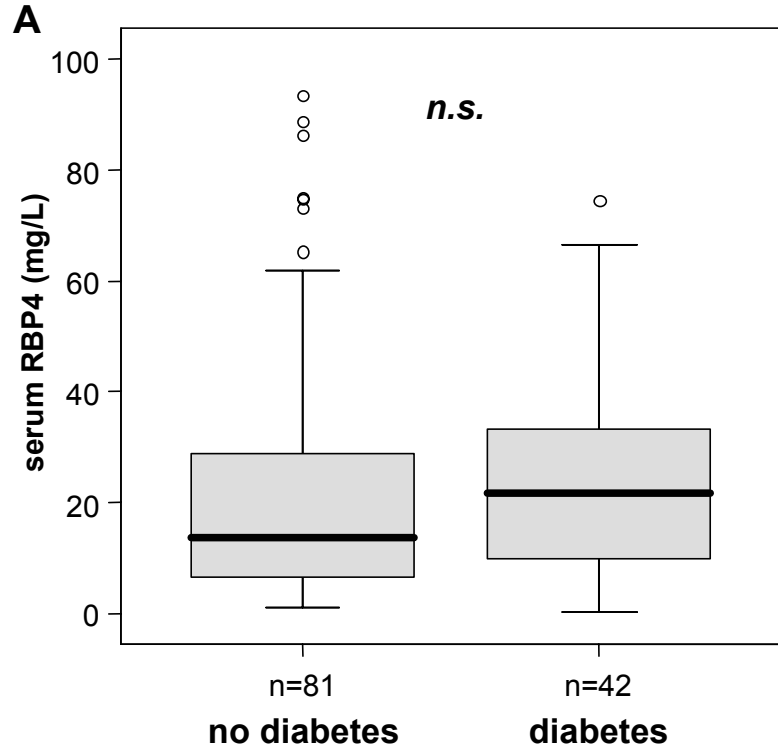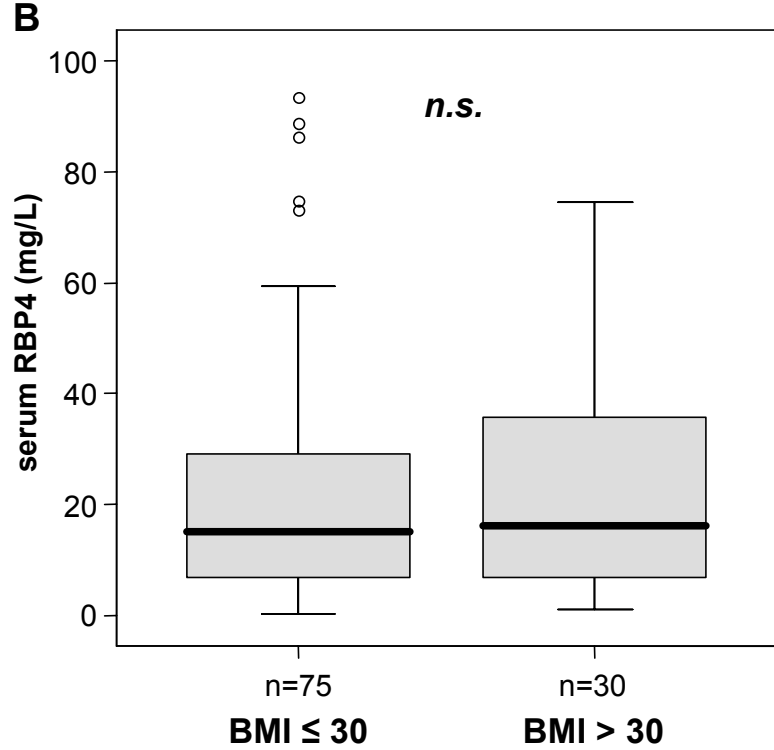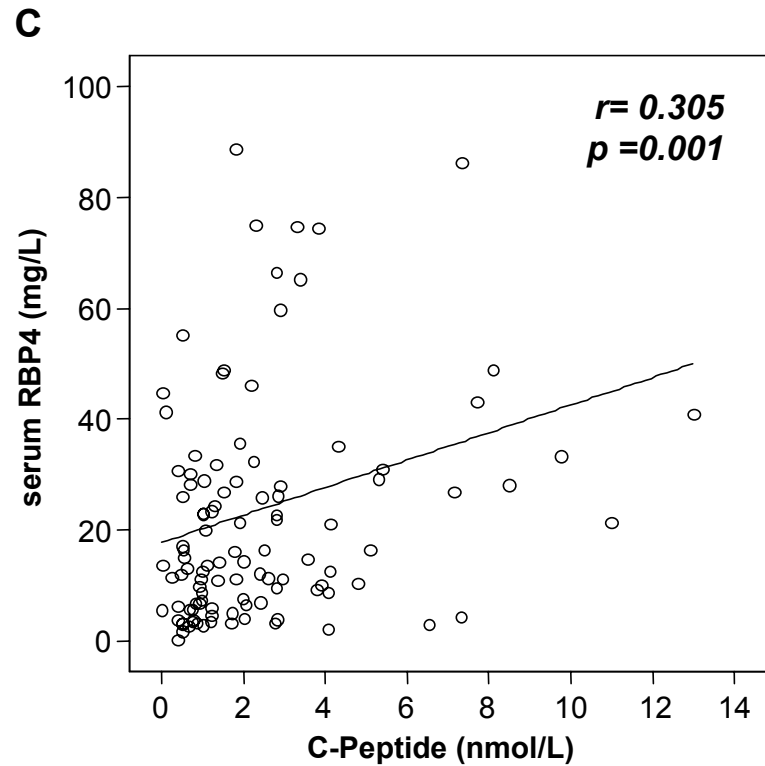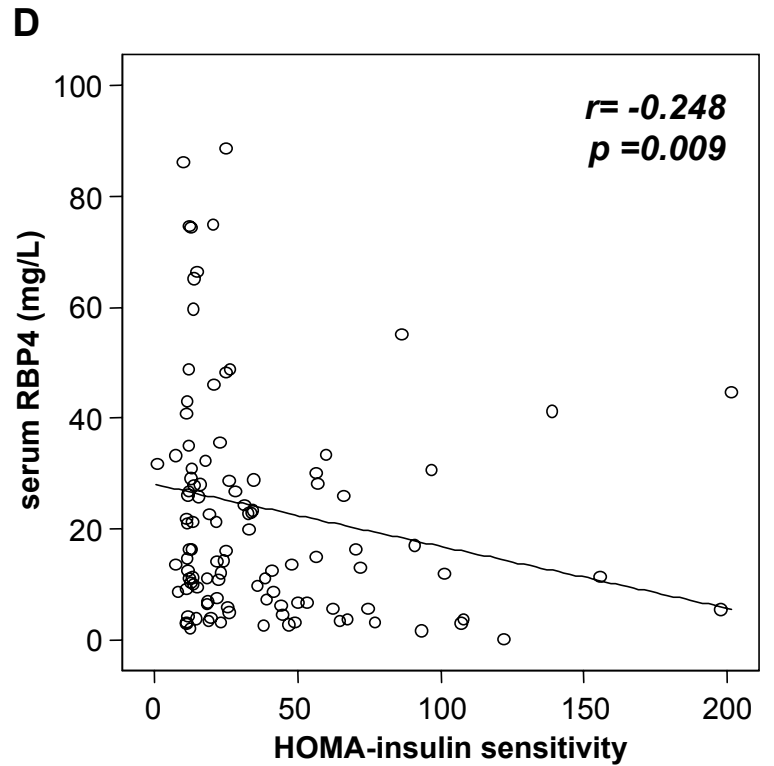

Supplement: MOESM4 [file 9732544]
